# Supplementary material for: A hybrid absorption–adsorption method to efficiently capture carbon
Source: PubMed Central journal article supplement (PMC4214418; doi:10.1038/ncomms6147), 2014-10-09
Supplement: ncomms6147-s1.pdf [file ncomms6147-s1.pdf]

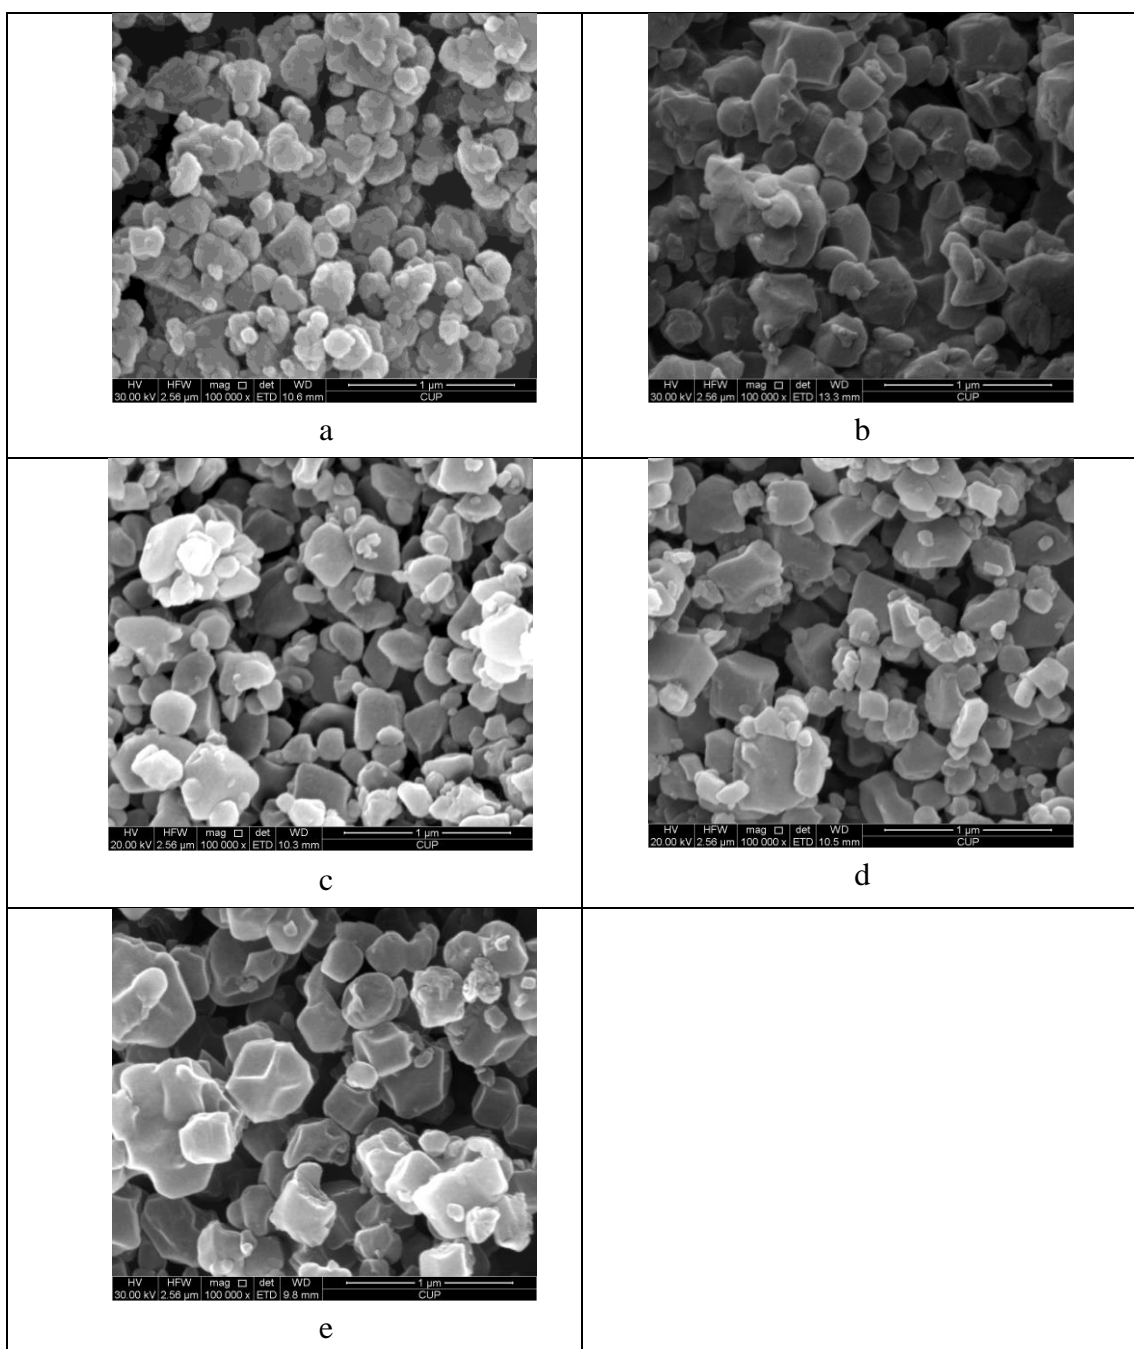

**Supplementary Figure 1. Scanning electron microscopy (SEM) images** Comparison of the SEM images of solid zeolitic imidazolate framework-8 (ZIF-8) between (a) fresh, recovered from ZIF-8/glycol slurry after being used for (b) one, (c) two, and (d) three times in separating  $\text{CO}_2/\text{N}_2$  gas mixture ( $z_1=0.2231$ ) at 293.15 K, (e) recovered from ZIF-8/glycol-mIm slurry that has been used for 33 cycles of sorption/desorption at 303.15 K within 25 days. The morphology of recovered ZIF-8 is as the same as that of fresh sample.

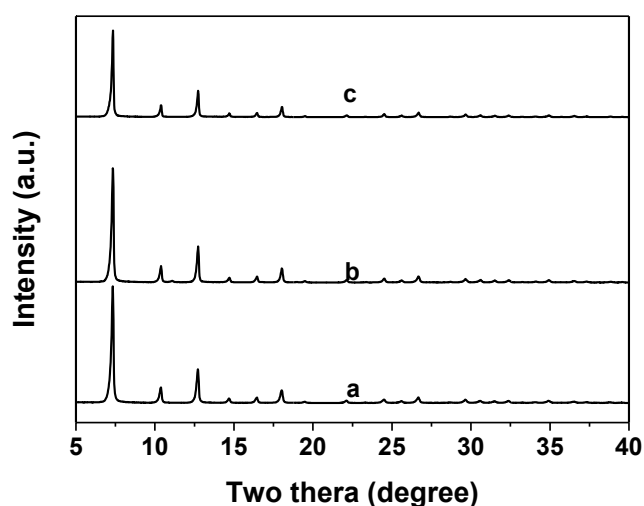

**Supplementary Figure 2. Powder X-ray diffraction (PXRD) data** Comparison of the experimental XRD patterns of solid ZIF-8 between (a) fresh ZIF-8, (b) recovered from ZIF-8/glycol slurry after being used for separating CO<sub>2</sub>/N<sub>2</sub> gas mixture ( $z_1=0.2231$ ), and (c) recovered from ZIF-8/glycol-mIm that has been used for 33 cycles of sorption/desorption at 303.15 K within 25 days. Y-axis of the graph shows the relative intensity. The comparison shows that the framework structure of recovered ZIF-8 is as the same as that of fresh sample.

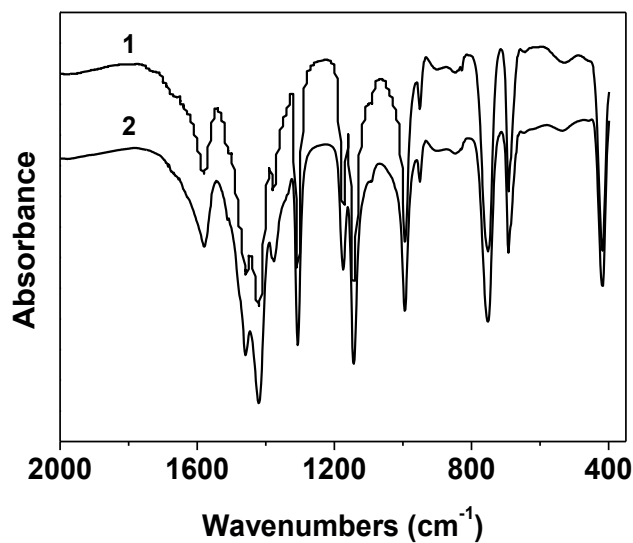

IR wavenumbers from 400 to 2000  $\text{cm}^{-1}$

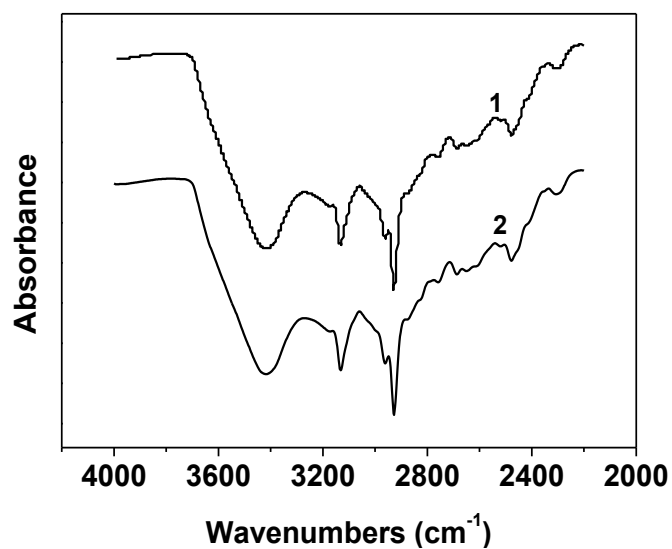

IR wavenumbers from 2000 to 4000  $\text{cm}^{-1}$

**Supplementary Figure 3. Fourier transform Infrared (FT-IR) measurements**

Comparison of the FT-IR spectra of solid ZIF-8 between (1) fresh and (2) recovered from ZIF-8/glycol slurry after being used for separating  $\text{CO}_2/\text{N}_2$  gas mixture ( $z_1=0.2231$ ) at 293.15 K. The result shows that the framework structure of recovered ZIF-8 is as the same as that of fresh sample.

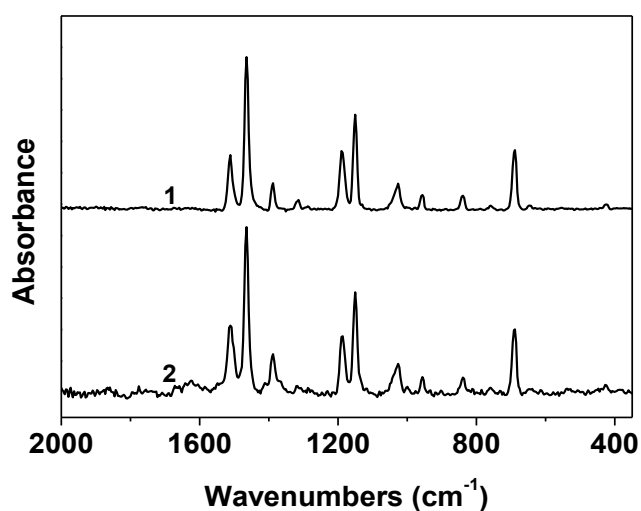

Raman wavenumbers from 400 to 2000  $\text{cm}^{-1}$

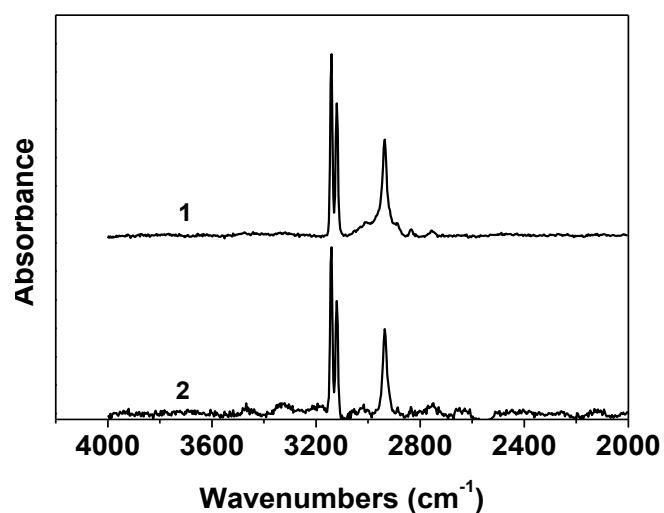

Raman wavenumbers from 2000 to 4000  $\text{cm}^{-1}$

**Supplementary Figure 4. Fourier transform Raman (FT-Raman) measurements**

Comparison of the FT-Raman spectra of solid ZIF-8 between (1) fresh and (2) recovered from ZIF-8/glycol slurry after being used for separating  $\text{CO}_2/\text{N}_2$  gas mixture ( $z_1=0.2231$ ). The result shows that the framework structure of recovered ZIF-8 is as the same as that of fresh sample.

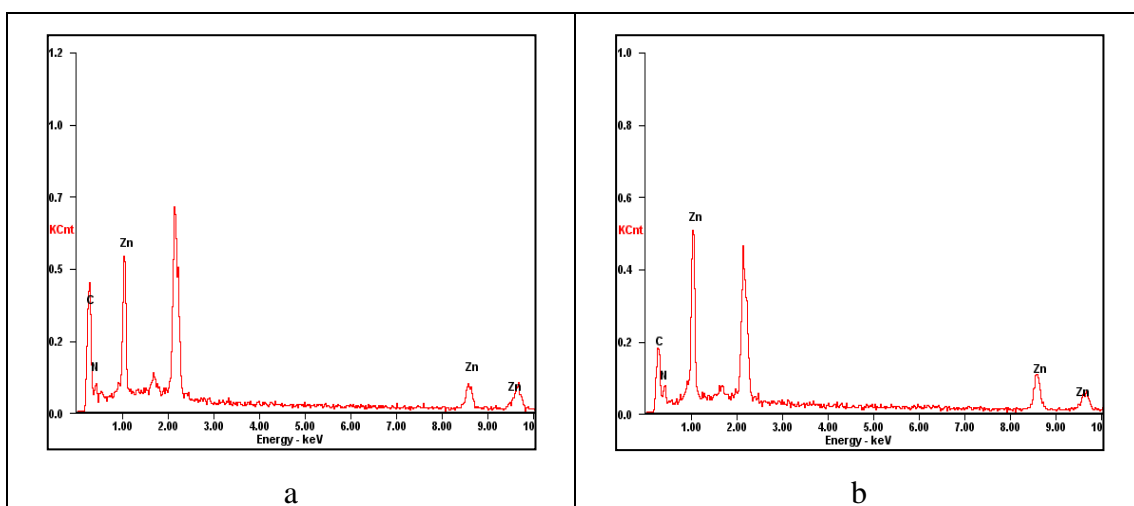

**Supplementary Figure 5. Energy dispersive X-ray (EDX) measurements** EDX spectra of solid ZIF-8 between (a) fresh and (b) recovered from ZIF-8/glycol slurry after being used for one time. The elementary composition of recovered ZIF-8 from ZIF-8/glycol slurry is as the same as that of fresh sample.

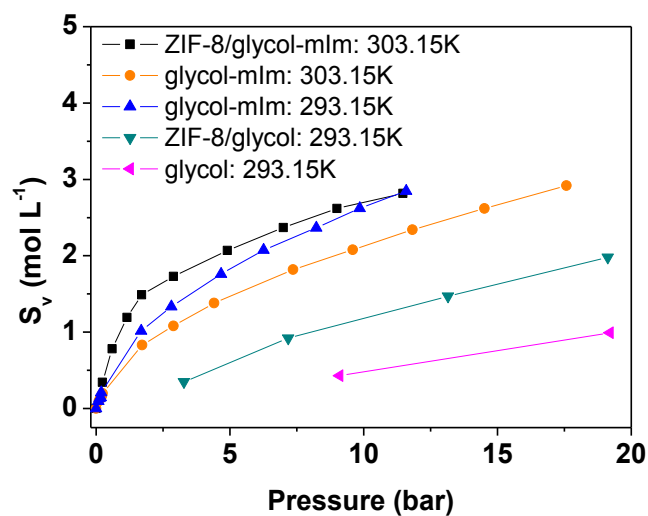

**Supplementary Figure 6. CO<sub>2</sub> absorption isotherms** The apparent volumetric solubility ( $S_v$ ) of CO<sub>2</sub> in pure glycol, glycol-mIm (3:2) mixture, ZIF-8 (15.2 wt%)/glycol slurry, and ZIF-8 (15 wt%)/glycol-mIm (3:2) slurry at different temperatures. As can be seen, the order of  $S_v$  is ZIF-8/glycol-mIm > glycol-mIm > ZIF-8/glycol > glycol, demonstrating the superiority of absorption-adsorption hybrid method for CO<sub>2</sub> capture.

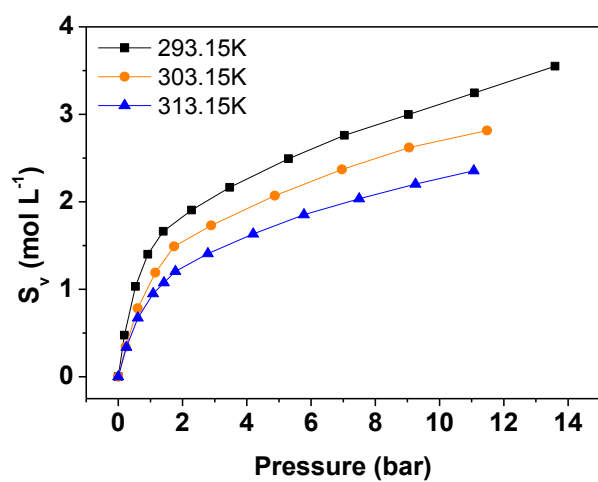

**Supplementary Figure 7. Variable temperature isotherms** The apparent volumetric solubility of CO<sub>2</sub> ( $S_v$ ) in ZIF-8/glycol-mIm slurry at three different temperatures.

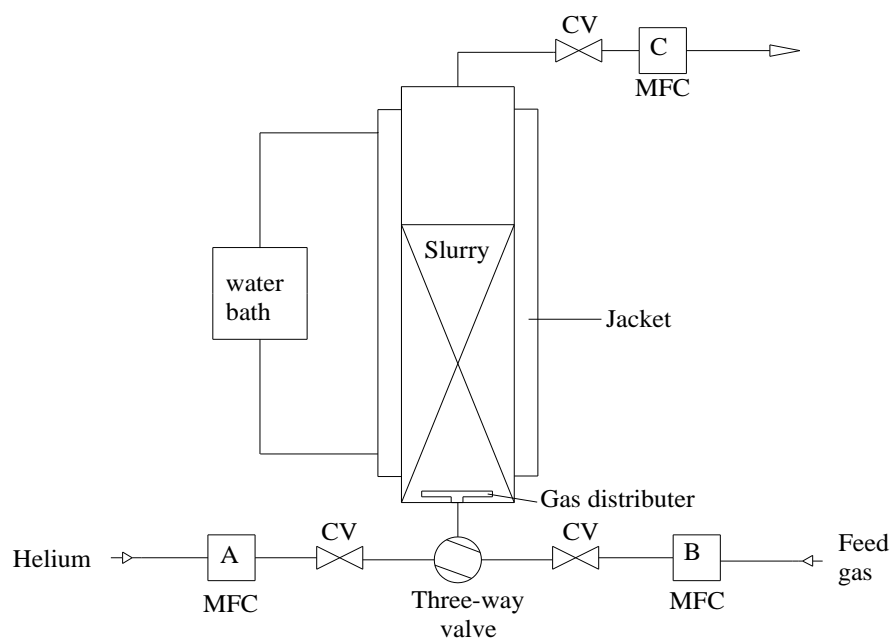

**Supplementary Figure 8. Column breakthrough experiment.** MFC stands for the mass flow controller.



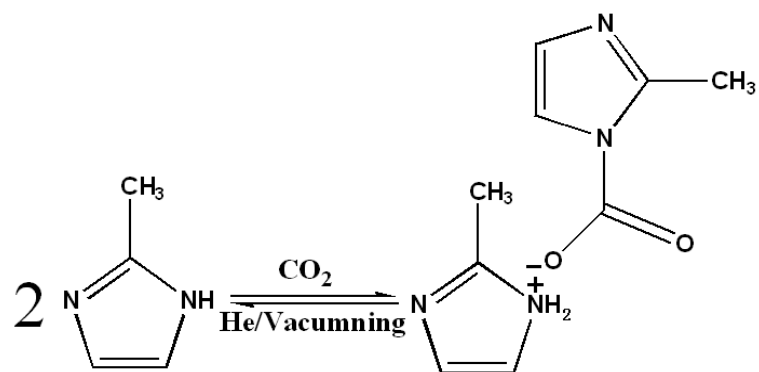

**Supplementary Figure 9.** Schematic for the absorption mechanism of CO<sub>2</sub> in glycol-mIm solution.

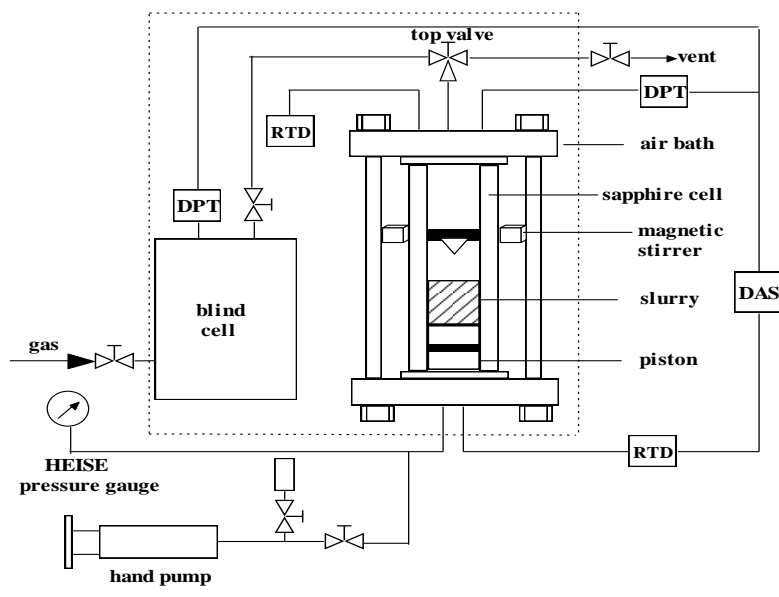

**Supplementary Figure 10. Schematic diagram of the experimental apparatus.** RTD, resistance thermocouple detector; DPT, differential pressure transducer; and DAS, data acquisition system.

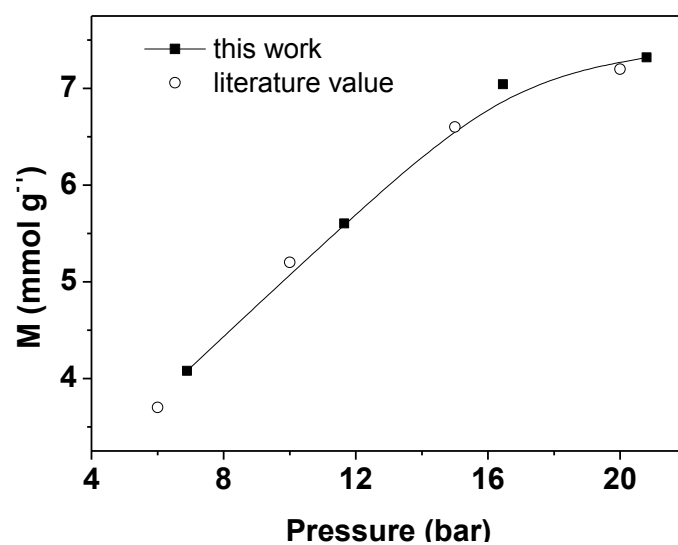

**Supplementary Figure 11. CO<sub>2</sub> adsorption isotherms** Comparison of the pure CO<sub>2</sub> adsorption isotherm in solid ZIF-8 at 303.15 K measured in this work and the one reported in literature<sup>1</sup>.

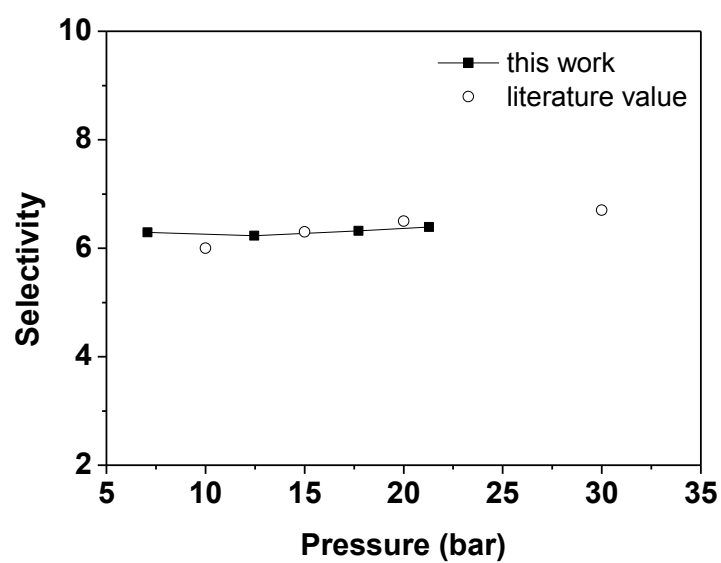

**Supplementary Figure 12. CO<sub>2</sub>/N<sub>2</sub> mixture on ZIF-8** Comparison of gas selectivities obtained for CO<sub>2</sub>/N<sub>2</sub> ( $z_1=0.2286$ ) mixture in solid ZIF-8 at 303.15 K measured in this work and the ones reported in literature<sup>2</sup>.

**Supplementary Table 1:** CO<sub>2</sub>/N<sub>2</sub> gas mixture ( $z_1=0.2231$ ) separation results by using ZIF-8/glycol slurry with a ZIF-8 mass fraction of 0.152 at 293.15 K and different initial gas-slurry volume ratios  $\Phi$  and initial pressures  $P_0$ .

| $P_0$ (bar) | $P_E$ (bar) | $\Phi$ | $P_{E-CO_2}$ (bar) | $y_1$ (%) | $x_1$ (%) | $\beta$ | $S_c$ (mol L <sup>-1</sup> bar <sup>-1</sup> ) |
|-------------|-------------|--------|--------------------|-----------|-----------|---------|------------------------------------------------|
| 7.14        | 6.25        | 18     | 0.58               | 9.22      | 96.68     | 286     | 0.21                                           |
| 12.41       | 10.56       | 31     | 1.05               | 9.89      | 93.69     | 135     | 0.18                                           |
| 17.58       | 15.00       | 45     | 1.52               | 10.10     | 89.54     | 76      | 0.18                                           |
| 23.25       | 20.17       | 59     | 2.34               | 11.58     | 86.81     | 50      | 0.14                                           |
| 28.71       | 25.79       | 75     | 3.06               | 11.85     | 86.87     | 49      | 0.13                                           |

**Supplementary Table 2:** CO<sub>2</sub>/N<sub>2</sub> gas mixture ( $z_1=0.2231$ ) separation results by using recycled ZIF-8/glycol slurries with a ZIF-8 mass fraction of 0.152 and nearly the same initial pressure of around 17.58 bar.

| Reused times   | $P_0$<br>(bar) | $P_E$<br>(bar) | $P_{E-CO_2}$<br>(bar) | $y_1$<br>(%) | $x_1$<br>(%) | $\beta$ | $S_c$<br>(mol L <sup>-1</sup> bar <sup>-1</sup> ) |
|----------------|----------------|----------------|-----------------------|--------------|--------------|---------|---------------------------------------------------|
| 0 <sup>a</sup> | 17.58          | 15.00          | 1.52                  | 10.10        | 89.54        | 76      | 0.18                                              |
| 1              | 17.82          | 15.33          | 1.79                  | 11.67        | 91.16        | 78      | 0.14                                              |
| 2              | 17.75          | 14.96          | 1.37                  | 9.18         | 89.84        | 88      | 0.21                                              |
| 3              | 18.00          | 15.16          | 1.43                  | 9.41         | 88.99        | 78      | 0.21                                              |
| 4              | 17.64          | 15.14          | 1.64                  | 10.86        | 90.13        | 75      | 0.16                                              |

<sup>a</sup>0 represents using fresh slurry.

**Supplementary Table 3:** CO<sub>2</sub>/N<sub>2</sub> gas mixture ( $z_1=0.2231$ ) separation results by using ZIF-8/glycol slurry with a ZIF-8 mass fraction of 0.152 at nearly the same initial pressure of around 17.58 bar and different experimental temperatures.

| $T$ (K) | $P_E$ (bar) | $\Phi$ | $P_{E-CO_2}$ (bar) | $y_1$ (%) | $x_1$ (%) | $\beta$ | $S_c$ (mol L <sup>-1</sup> bar <sup>-1</sup> ) |
|---------|-------------|--------|--------------------|-----------|-----------|---------|------------------------------------------------|
| 274.15  | 15.10       | 50     | 1.24               | 8.20      | 92.92     | 147     | 0.27                                           |
| 283.15  | 14.98       | 46     | 1.33               | 8.89      | 95.38     | 212     | 0.22                                           |
| 293.15  | 15.00       | 45     | 1.52               | 10.10     | 89.54     | 76      | 0.18                                           |
| 303.15  | 15.65       | 44     | 1.98               | 12.67     | 81.06     | 29      | 0.12                                           |

**Supplementary Table 4:** CO<sub>2</sub>/H<sub>2</sub> gas mixture ( $z_1=0.2386$ ) separation results by using ZIF-8/glycol slurry with a ZIF-8 mass fraction of 0.152 at 293.15 K and different pressures.

| $P_0$ (bar) | $P_E$ (bar) | $\Phi$ | $P_{E-CO_2}$ (bar) | $y_1$ (%) | $x_1$ (%) | $\beta$ | $S_c$ (mol L <sup>-1</sup> bar <sup>-1</sup> ) |
|-------------|-------------|--------|--------------------|-----------|-----------|---------|------------------------------------------------|
| 7.33        | 6.18        | 18     | 0.72               | 11.62     | 98.99     | 745     | 0.15                                           |
| 9.28        | 8.12        | 23     | 1.03               | 12.71     | 98.14     | 362     | 0.16                                           |
| 12.43       | 10.52       | 31     | 1.02               | 9.68      | 95.47     | 197     | 0.22                                           |
| 17.25       | 14.36       | 43     | 1.24               | 8.66      | 95.46     | 133     | 0.26                                           |
| 27.62       | 23.82       | 70     | 2.59               | 10.87     | 92.34     | 99      | 0.18                                           |
| 36.85       | 32.38       | 94     | 3.94               | 12.17     | 88.54     | 56      | 0.14                                           |



**Supplementary Table 5:** CO<sub>2</sub>/CH<sub>4</sub> gas mixture ( $z_1=0.2268$ ) separation results by using ZIF-8/glycol slurry; ZIF-8 mass fraction in slurry and experimental temperature are respectively specified to 0.152 and 293.15 K except for the two labeled experimental runs.

| $P_0$ (bar)        | $P_E$ (bar) | $\Phi$ | $P_{E-CO_2}$ (bar) | $y_1$ (%) | $x_1$ (%) | $\beta$ | $S_c$ (mol L <sup>-1</sup> bar <sup>-1</sup> ) |
|--------------------|-------------|--------|--------------------|-----------|-----------|---------|------------------------------------------------|
| 7.32               | 6.19        | 18     | 0.79               | 12.83     | 82.14     | 31      | 0.13                                           |
| 7.89               | 6.48        | 20     | 0.71               | 11.01     | 79.83     | 32      | 0.17                                           |
| 10.22              | 8.57        | 26     | 1.01               | 11.82     | 83.19     | 37      | 0.14                                           |
| 13.66              | 11.06       | 34     | 1.21               | 10.96     | 74.19     | 23      | 0.17                                           |
| 18.33              | 15.30       | 48     | 1.95               | 12.74     | 70.51     | 17      | 0.13                                           |
| 25.26              | 21.28       | 67     | 2.84               | 13.35     | 69.94     | 15      | 0.12                                           |
| 27.52              | 23.29       | 73     | 3.17               | 13.60     | 70.90     | 15      | 0.11                                           |
| 10.19 <sup>a</sup> | 8.68        | 24     | 1.14               | 13.08     | 82.45     | 31      | 0.11                                           |
| 10.38 <sup>b</sup> | 8.76        | 24     | 1.00               | 11.43     | 82.56     | 37      | 0.14                                           |

<sup>a</sup> The experimental temperature and ZIF-8 mass fraction in the slurry were specified to 303.15 K and 0.152, respectively.

<sup>b</sup> The experimental temperature and ZIF-8 mass fraction in the slurry were specified to 303.15 K and 0.173, respectively.

**Supplementary Table 6:** CO<sub>2</sub>/N<sub>2</sub> gas mixture ( $z_1=0.2231$ ) separation results by using slurries formed by ZIF-8 with different liquids at 293.15 K.

| Slurry                        | $m_F$ | $P_0$<br>(bar) | $P_E$<br>(bar) | $\Phi$ | $P_{E-CO_2}$<br>(bar) | $y_1$<br>(%) | $x_1$<br>(%) | $\beta$ | $S_c$<br>(mol<br>L <sup>-1</sup><br>bar <sup>-1</sup> ) |
|-------------------------------|-------|----------------|----------------|--------|-----------------------|--------------|--------------|---------|---------------------------------------------------------|
| ZIF-8 +<br>ethanol            | 0.275 | 18.01          | 15.57          | 66     | 2.24                  | 14.41        | 64.62        | 11      | 0.14                                                    |
| ZIF-8 +<br>cyclohexane        | 0.278 | 17.92          | 14.24          | 53     | 1.78                  | 12.50        | 60.53        | 11      | 0.22                                                    |
| ZIF-8 +<br>n-hexane           | 0.302 | 19.13          | 16.02          | 53     | 2.30                  | 14.37        | 63.86        | 11      | 0.10                                                    |
| ZIF-8 +<br>methylbenzene      | 0.257 | 22.88          | 20.64          | 89     | 3.46                  | 16.76        | 75.98        | 16      | 0.08                                                    |
| ZIF-8 +<br>tetrachloromethane | 0.111 | 17.61          | 13.21          | 44     | 1.29                  | 9.77         | 58.94        | 13      | 0.23                                                    |
| ZIF-8 +<br>triethylene glycol | 0.151 | 17.79          | 15.65          | 45     | 1.98                  | 12.65        | 88.89        | 55      | 0.12                                                    |

**Supplementary Table 7:** Experimental results in absorption separation of CO<sub>2</sub> containing gas mixtures using glycol or water at 293.15 K.

| $P_0$ (bar) | $P_E$ (bar) | $\Phi$ | $P_{E-CO_2}$ (bar)                                        | $y_1$ (%) | $x_1$ (%)       | $\beta$ | $S_c$ (mol L <sup>-1</sup> bar <sup>-1</sup> ) |
|-------------|-------------|--------|-----------------------------------------------------------|-----------|-----------------|---------|------------------------------------------------|
|             |             |        | Feed gas: 22.3% CO <sub>2</sub> + 77.7% N <sub>2</sub> ;  |           | Solvent: glycol |         |                                                |
| 18.00       | 16.39       | 54     | 2.79                                                      | 17.03     | 72.12           | 13      | 0.057                                          |
|             |             |        | Feed gas: 22.7% CO <sub>2</sub> + 77.3% CH <sub>4</sub> ; |           | Solvent: water  |         |                                                |
| 12.59       | 11.85       | 39     | 2.32                                                      | 19.61     | 50.05           | 4.1     | 0.037                                          |

**Supplementary Table 8:** CO<sub>2</sub>/N<sub>2</sub> gas mixture ( $z_1=0.2286$ ) separation results in solid ZIF-8 at 293.15 K with different initial gas-solid volume ratio ( $\Phi'$ ) and initial pressure ( $P_0$ ).

| $\Phi'$ | $P_0$ (bar) | $P_E$ (bar) | $P_{E-CO_2}$ (bar) | $y_1$ (%) | $x_1$ (%) | $\beta'$ |
|---------|-------------|-------------|--------------------|-----------|-----------|----------|
| 137     | 8.03        | 6.81        | 1.03               | 15.18     | 66.21     | 11       |
| 206     | 12.02       | 9.78        | 1.43               | 14.67     | 58.52     | 8.2      |
| 272     | 15.41       | 12.49       | 1.90               | 15.22     | 58.52     | 7.9      |
| 361     | 20.87       | 17.11       | 2.61               | 15.27     | 56.63     | 7.2      |
| 423     | 24.48       | 20.13       | 3.10               | 15.40     | 57.18     | 7.3      |
| 542     | 31.09       | 25.87       | 4.04               | 15.60     | 58.06     | 7.5      |

**Supplementary Table 9:** CO<sub>2</sub>/H<sub>2</sub> gas mixture ( $z_1=0.2386$ ) separation results in solid ZIF-8 at 293.15 K with different initial gas-solid volume ratio ( $\Phi'$ ) and initial pressure ( $P_0$ ).

| $\Phi'$ | $P_0$ (bar) | $P_E$ (bar) | $P_{E-CO_2}$ (bar) | $y_1$ (%) | $x_1$ (%) | $\beta'$ |
|---------|-------------|-------------|--------------------|-----------|-----------|----------|
| 123     | 7.28        | 6.28        | 0.90               | 14.39     | 86.43     | 37       |
| 190     | 11.24       | 9.62        | 1.38               | 14.36     | 81.55     | 26       |
| 297     | 18.09       | 14.81       | 2.15               | 14.50     | 75.08     | 18       |
| 352     | 21.24       | 17.64       | 2.55               | 14.45     | 76.77     | 19       |
| 435     | 26.01       | 21.97       | 3.21               | 14.60     | 77.81     | 20       |
| 525     | 31.72       | 26.53       | 3.91               | 14.72     | 76.64     | 19       |

**Supplementary Table 10:** CO<sub>2</sub>/CH<sub>4</sub> gas mixture ( $z_1=0.2342$ ) separation results in solid ZIF-8 at 293.15 K with different initial gas-solid volume ratio ( $\Phi'$ ) and initial pressure ( $P_0$ ).

| $\Phi'$ | $P_0$ (bar) | $P_E$ (bar) | $P_{E-CO_2}$ (bar) | $y_1$ (%) | $x_1$ (%) | $\beta'$ |
|---------|-------------|-------------|--------------------|-----------|-----------|----------|
| 157     | 9.16        | 6.23        | 1.09               | 17.42     | 36.58     | 2.7      |
| 230     | 13.44       | 9.48        | 1.64               | 17.29     | 38.80     | 3.0      |
| 323     | 18.41       | 13.52       | 2.38               | 17.60     | 39.49     | 3.0      |
| 419     | 23.48       | 17.77       | 3.13               | 17.62     | 40.98     | 3.2      |
| 520     | 28.72       | 22.20       | 4.00               | 18.02     | 41.11     | 3.2      |
| 588     | 32.08       | 25.40       | 4.60               | 18.12     | 42.33     | 3.3      |

**Supplementary Table 11:** CO<sub>2</sub>/N<sub>2</sub> gas mixture ( $z_1=0.2065$ ) separation results by using glycol-mIm liquid mixture where mass ratio between glycol and mIm in liquid and experimental temperature are specified to 3:2 and 303.15 K, respectively.

| $\Phi$ | $P_0$<br>(bar) | $P_E$<br>(bar) | $P_{E-CO_2}$<br>(bar) | $y_1$<br>(mol%) | $x_1$<br>(mol%) | $\beta$ | $S_c$<br>(mol L <sup>-1</sup> bar <sup>-1</sup> ) |
|--------|----------------|----------------|-----------------------|-----------------|-----------------|---------|---------------------------------------------------|
| 11     | 5.65           | 4.55           | 0.10                  | 2.26            | 82.65           | 206     | 0.94                                              |
| 15     | 7.68           | 6.20           | 0.15                  | 2.40            | 86.90           | 270     | 0.86                                              |
| 20     | 9.82           | 8.00           | 0.22                  | 2.70            | 87.70           | 257     | 0.75                                              |
| 24     | 11.63          | 9.45           | 0.24                  | 2.53            | 83.81           | 199     | 0.82                                              |

**Supplementary Table 12:** CO<sub>2</sub>/N<sub>2</sub> gas mixture ( $z_1=0.2065$ ) separation results by using ZIF-8/glycol-mIm slurry; ZIF-8 mass fraction in slurry, mass ratio between glycol and mIm, and experimental temperature are respectively specified to 0.15, 3:2 and 303.15 K except for the labeled experimental run.

| $\Phi$          | $P_0$<br>(bar) | $P_E$<br>(bar) | $P_{E-CO_2}$<br>(bar) | $y_1$<br>(mol%) | $x_1$<br>(mol%) | $\beta$ | $S_c$<br>(mol L <sup>-1</sup> bar <sup>-1</sup> ) |
|-----------------|----------------|----------------|-----------------------|-----------------|-----------------|---------|---------------------------------------------------|
| 9               | 4.43           | 3.51           | 0.08                  | 2.40            | 74.41           | 118     | 0.92                                              |
| 14              | 6.60           | 5.22           | 0.07                  | 1.38            | 83.74           | 367     | 1.63                                              |
| 17              | 8.28           | 6.62           | 0.10                  | 1.59            | 84.77           | 345     | 1.43                                              |
| 24              | 11.35          | 9.17           | 0.15                  | 1.62            | 85.45           | 357     | 1.40                                              |
| 35              | 16.51          | 1.33           | 0.23                  | 1.73            | 87.43           | 394     | 1.29                                              |
| 14 <sup>a</sup> | 6.70           | 5.40           | 0.12                  | 2.25            | 81.23           | 188     | 0.92                                              |

<sup>a</sup> The temperature of this experimental run was specified to 313.15 K.



**Supplementary Table 13:** CO<sub>2</sub>/N<sub>2</sub> gas mixture ( $z_1=0.2065$ ) separation results by using ZIF-8/glycol-mIm slurry with three different ZIF-8 mass fractions ( $m_F$ ) in slurry where mass ratio between glycol and mIm and experimental temperature are specified to 3:2 and 303.15 K, respectively.

| $m_F$<br>(%) | $P_0$<br>(bar) | $P_E$<br>(bar) | $P_{E-CO_2}$<br>(bar) | $y_1$<br>(mol%) | $x_1$<br>(mol%) | $\beta$ | $S_c$<br>(mol L <sup>-1</sup> bar <sup>-1</sup> ) |
|--------------|----------------|----------------|-----------------------|-----------------|-----------------|---------|---------------------------------------------------|
| 5            | 6.30           | 5.13           | 0.11                  | 2.18            | 85.08           | 256     | 1.00                                              |
| 10           | 6.46           | 5.12           | 0.08                  | 1.53            | 82.99           | 313     | 1.48                                              |
| 15           | 6.60           | 5.22           | 0.07                  | 1.38            | 83.74           | 367     | 1.63                                              |

**Supplementary Table 14:** CO<sub>2</sub>/CH<sub>4</sub> gas mixture ( $z_1=0.2193$ ) separation results by using ZIF-8/glycol-mIm slurry where ZIF-8 mass fraction in slurry, temperature, mass ratio between glycol, and mIm are specified to 0.15, 3:2, and 303.15 K, respectively.

| $\Phi$ | $P_0$<br>(bar) | $P_E$<br>(bar) | $P_{E-CO_2}$<br>(bar) | $y_1$<br>(mol%) | $x_1$<br>(mol%) | $\beta$ | $S_c$<br>(mol L <sup>-1</sup> bar <sup>-1</sup> ) |
|--------|----------------|----------------|-----------------------|-----------------|-----------------|---------|---------------------------------------------------|
| 11     | 5.39           | 4.03           | 0.10                  | 2.76            | 69.81           | 81      | 0.89                                              |
| 14     | 6.48           | 4.91           | 0.12                  | 2.05            | 74.24           | 138     | 1.21                                              |
| 16     | 7.56           | 5.78           | 0.14                  | 2.21            | 73.86           | 125     | 1.12                                              |
| 20     | 9.29           | 7.18           | 0.18                  | 2.18            | 75.86           | 141     | 1.13                                              |
| 32     | 14.66          | 11.48          | 0.28                  | 2.13            | 76.89           | 144     | 1.14                                              |
| 96     | 41.38          | 32.79          | 0.87                  | 2.65            | 78.45           | 134     | 1.00                                              |
| 161    | 66.41          | 53.46          | 1.32                  | 3.13            | 73.90           | 87      | 0.76                                              |

**Supplementary Table 15:** CO<sub>2</sub>/H<sub>2</sub> gas mixture ( $z_1=0.2360$ ) separation results by using ZIF-8/glycol-mIm slurry where ZIF-8 mass fraction in slurry, mass ratio between glycol and mIm, and temperature are specified to 0.15, 3:2, and 303.15 K, respectively.

| $\Phi$ | $P_0$<br>(bar) | $P_E$<br>(bar) | $P_{E-CO_2}$<br>(bar) | $y_1$<br>(mol%) | $x_1$<br>(mol%) | $\beta$ | $S_c$<br>(mol L <sup>-1</sup> bar <sup>-1</sup> ) |
|--------|----------------|----------------|-----------------------|-----------------|-----------------|---------|---------------------------------------------------|
| 13     | 6.40           | 4.95           | 0.10                  | 2.09            | 86.04           | 288     | 1.23                                              |
| 23     | 11.33          | 8.91           | 0.17                  | 1.88            | 88.08           | 386     | 1.37                                              |
| 44     | 21.51          | 16.99          | 0.32                  | 1.88            | 92.23           | 618     | 1.33                                              |
| 65     | 31.60          | 25.38          | 0.47                  | 1.85            | 94.25           | 871     | 1.35                                              |
| 85     | 41.33          | 33.41          | 0.68                  | 2.02            | 95.16           | 951     | 1.21                                              |

**Supplementary Table 16:** Results of the breakthrough experiment for CO<sub>2</sub>/N<sub>2</sub> mixture ( $z_1=0.2065$ ) with inlet gas flow rate,  $V_{in}$ , of 23 (mL min<sup>-1</sup>) in ZIF-8/glycol-mIm slurry.

| Time (h) | N <sub>2</sub> in outlet gas (mol%) | outlet gas flow $V_{out}$ (mL min <sup>-1</sup> ) | <sup>a</sup> $R_{N_2}$ (%) | <sup>b</sup> $R_{CO_2}$ (%) |
|----------|-------------------------------------|---------------------------------------------------|----------------------------|-----------------------------|
| 0        | 0                                   | 0.0                                               | -                          |                             |
| 0.008    | 100                                 | 6.0                                               | 32.88                      | 100                         |
| 0.10     | 100                                 | 10.0                                              | 54.79                      | 100                         |
| 0.28     | 99.56                               | 14.0                                              | 76.37                      | 98.70                       |
| 1.38     | 98.24                               | 16.0                                              | 86.13                      | 94.07                       |
| 1.90     | 97.68                               | 16.5                                              | 88.31                      | 91.94                       |
| 2.11     | 97.36                               | 17.0                                              | 90.69                      | 90.55                       |
| 2.26     | 97.07                               | 18.0                                              | 95.74                      | 88.90                       |
| 2.48     | 96.73                               | 18.2                                              | 96.46                      | 87.47                       |
| 2.74     | 96.38                               | 18.5                                              | 97.70                      | 85.90                       |
| 2.92     | 95.89                               | 19.0                                              | 99.83                      | 83.56                       |
| 3.14     | 95.65                               | 19.5                                              | 102.20                     | 82.14                       |
| 3.31     | 95.28                               | 19.7                                              | 102.85                     | 80.42                       |
| 3.55     | 94.94                               | 20.0                                              | 104.04                     | 78.69                       |
| 3.80     | 94.66                               | 20.2                                              | 104.77                     | 77.29                       |
| 4.06     | 94.13                               | 20.5                                              | 105.73                     | 74.66                       |
| 4.33     | 93.86                               | 20.7                                              | 106.46                     | 73.24                       |
| 4.60     | 93.19                               | 20.9                                              | 106.72                     | 70.03                       |
| 4.86     | 92.79                               | 21.0                                              | 106.77                     | 68.12                       |
| 5.15     | 92.32                               | 21.1                                              | 106.73                     | 65.88                       |
| 5.41     | 92.00                               | 21.3                                              | 107.37                     | 64.12                       |
| 6.06     | 91.63                               | 21.4                                              | 107.44                     | 62.29                       |
| 6.70     | 90.65                               | 21.7                                              | 107.78                     | 57.28                       |

$${}^a R_{N_2} = \frac{V_{in} \times y_{in-N_2}}{V_{out} \times y_{out-N_2}} \times 100, R_{N_2} \text{ is the transient recovery ratio of } N_2 \text{ in the outlet gas}$$

phase, where  $y_{in-N_2}$  and  $y_{out-N_2}$  are the mole fraction of N<sub>2</sub> in the feed gas and outlet gas, respectively;  $R_{N_2}$  with a value higher than 100% indicates that N<sub>2</sub> is desorbed from the system.

$${}^b R_{CO_2} = 1 - \frac{V_{in} \times y_{in-CO_2}}{V_{out} \times y_{out-CO_2}} \times 100, R_{CO_2} \text{ is the transient recovery ratio of } CO_2 \text{ in the slurry,}$$

where  $y_{in-CO_2}$  and  $y_{out-CO_2}$  are the mole fraction of CO<sub>2</sub> in the feed gas and outlet gas, respectively.

**Supplementary Table 17:** Results of breakthrough experiment for CO<sub>2</sub>/CH<sub>4</sub> mixture ( $z_1=0.276$ ) with inlet gas flow rate,  $V_{in}$ , of 24 (mL min<sup>-1</sup>) in ZIF-8/glycol-mIm slurry.

| Time (h) | CH <sub>4</sub> in outlet gas (mol%) | outlet gas flow $V_{out}$ (mL min <sup>-1</sup> ) | $R_{CH_4}$ (%) | $R_{CO_2}$ (%) |
|----------|--------------------------------------|---------------------------------------------------|----------------|----------------|
| 0.00     | 0.00                                 | 0.0                                               | -              | -              |
| 0.01     | 100.00                               | 6.0                                               | 35.51          | 100            |
| 0.10     | 100.00                               | 9.0                                               | 53.27          | 100            |
| 0.17     | 99.79                                | 10.0                                              | 59.06          | 99.70          |
| 0.50     | 98.48                                | 11.0                                              | 64.11          | 97.65          |
| 0.88     | 97.48                                | 12.0                                              | 69.23          | 95.74          |
| 1.37     | 96.96                                | 12.5                                              | 71.73          | 94.65          |
| 1.75     | 96.10                                | 13.0                                              | 73.94          | 92.86          |
| 2.70     | 95.49                                | 13.5                                              | 76.30          | 91.43          |
| 3.38     | 94.44                                | 14.0                                              | 78.25          | 89.04          |
| 4.23     | 93.44                                | 14.5                                              | 80.19          | 86.61          |
| 4.87     | 92.41                                | 15.5                                              | 84.77          | 83.44          |
| 6.03     | 90.92                                | 17.0                                              | 91.48          | 78.27          |
| 6.95     | 89.86                                | 18.5                                              | 98.39          | 73.59          |
| 7.70     | 88.98                                | 19.0                                              | 100.06         | 70.53          |
| 9.07     | 87.84                                | 20.0                                              | 103.98         | 65.77          |
| 9.38     | 87.27                                | 20.5                                              | 105.89         | 63.27          |

**Supplementary Table 18:** Results of the breakthrough experiment for CO<sub>2</sub>/CH<sub>4</sub> mixture ( $z_1=0.276$ ) with inlet gas flow rate,  $V_{in}$ , of 24 (mL min<sup>-1</sup>) in pure water.

| Time<br>(h) | CH <sub>4</sub> in outlet gas<br>(mol%) | outlet gas flow $V_{out}$<br>(mL min <sup>-1</sup> ) | $R_{CH_4}$<br>(%) | $R_{CO_2}$<br>(%) |
|-------------|-----------------------------------------|------------------------------------------------------|-------------------|-------------------|
| 0.00        | 0.00                                    | 0.0                                                  | -                 | -                 |
| 0.001       | 100                                     | 6.0                                                  | 34.09             | 100               |
| 0.005       | 99.79                                   | 10.0                                                 | 56.70             | 99.68             |
| 0.13        | 99.15                                   | 13.0                                                 | 73.23             | 98.33             |
| 0.23        | 97.50                                   | 13.5                                                 | 74.79             | 94.90             |
| 0.32        | 94.81                                   | 14.5                                                 | 78.11             | 88.64             |
| 0.43        | 89.33                                   | 16.0                                                 | 81.21             | 74.23             |
| 0.56        | 81.48                                   | 18.5                                                 | 85.64             | 48.28             |
| 0.73        | 76.33                                   | 20.5                                                 | 88.91             | 26.75             |
| 1.02        | 74.48                                   | 21.5                                                 | 90.98             | 17.17             |
| 1.22        | 74.33                                   | 22.0                                                 | 92.91             | 14.74             |
| 1.43        | 74.18                                   | 22.5                                                 | 94.83             | 12.30             |

**Supplementary Table 19:** Henry constant ( $H$ ) of gas components in liquid glycol at 293.15 K.

| Gas components  | $H$ (MPa g mmol <sup>-1</sup> ) |
|-----------------|---------------------------------|
| CO <sub>2</sub> | 2.15                            |
| CH <sub>4</sub> | 14.7                            |
| N <sub>2</sub>  | 48.2                            |
| H <sub>2</sub>  | 37.6                            |

### Supplementary references:

1. Pérez-Pellitero, J. *et al.* Adsorption of CO<sub>2</sub>, CH<sub>4</sub>, and N<sub>2</sub> on zeolitic imidazolate frameworks: experiments and simulations. *Chem. Eur. J.* **16**, 1560-1571 (2010).
2. Amrouche, H. *et al.* Experimental and computational study of functionality impact on sodalite-zeolitic imidazolate frameworks for CO<sub>2</sub> separation. *J. Phys. Chem. C* **115**, 16425-16432 (2011).
